# Supplementary material for: XRCC1 gene polymorphisms and risk of neuroblastoma in Chinese children
Source: publisher site journal article supplement (doi:10.18632/aging.101601), 2018-10-25
Supplement: Supplementary file [file aging-v10i10-101601-supplementary-material-SD2.pdf]

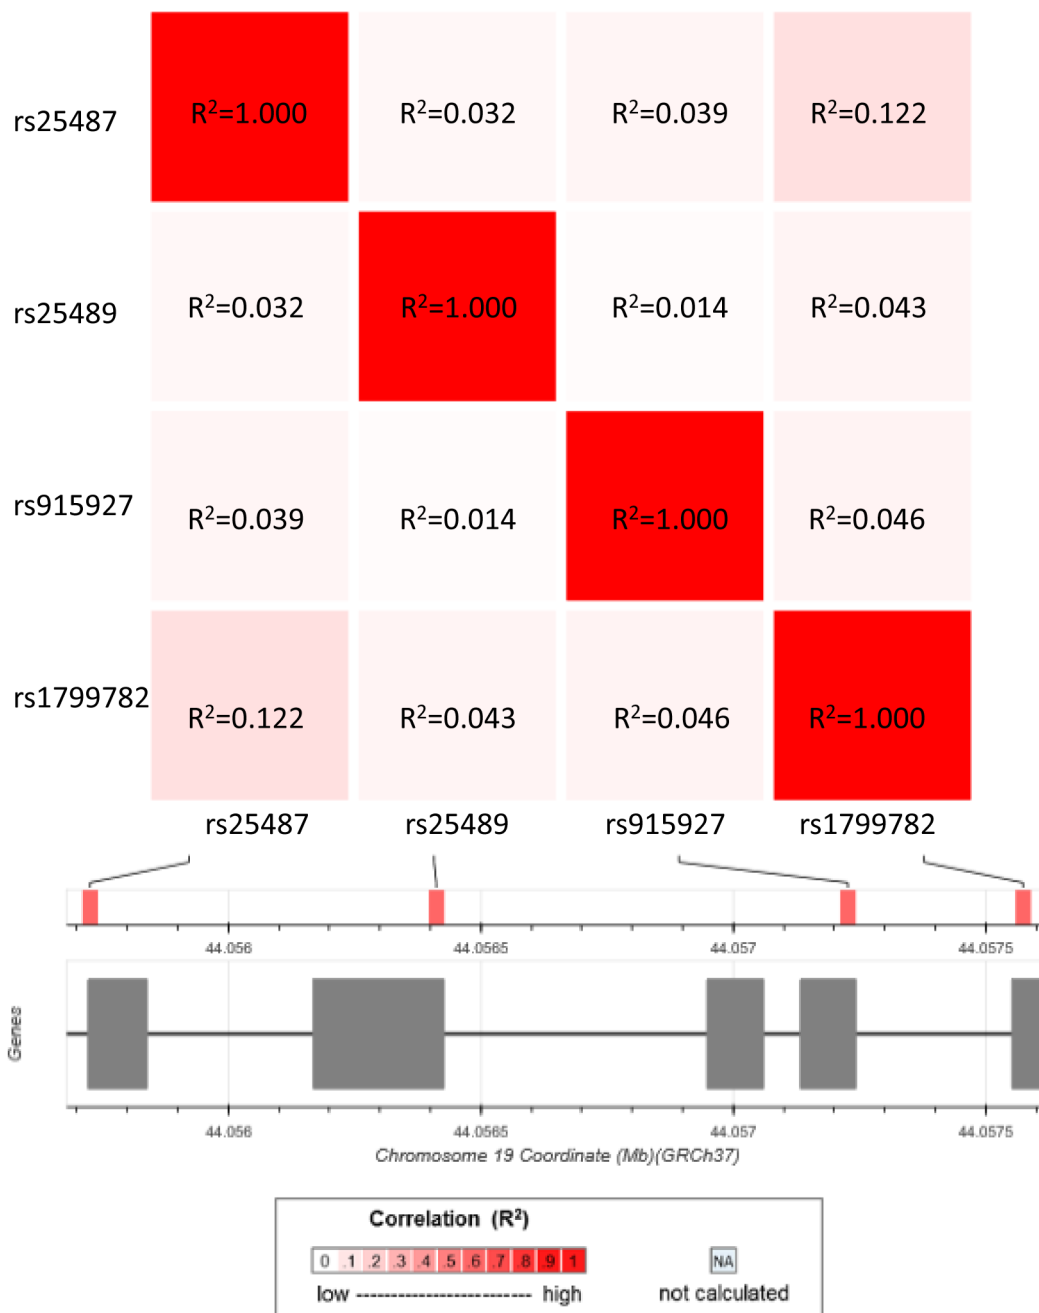

Supplementary Figure 1. Linkage disequilibrium analysis for the four selected *XRC1* polymorphisms in Han Chinese population consisted of CHB (Han Chinese in Beijing, China) and CHS (Southern Han Chinese) subjects.
